# Supplementary material for: Extrahypothalamic GABAergic nociceptin–expressing neurons regulate AgRP neuron activity to control feeding behavior
Source: J Clin Invest. 2019 Nov 18;130(1):126–42. doi: 10.1172/JCI130340 (PMC6934207; doi:10.1172/JCI130340)
Supplement: Supplemental data [file jci-130-130340-s045.pdf]

## Supplemental Data

**Supplemental Table 1.**

| Brain Regions                             | Expression level (%) |
|-------------------------------------------|----------------------|
| <b>Cortex</b>                             |                      |
| Prelimbic area                            | 0.1 ± 0.1            |
| Infralimbic area                          | 0.1 ± 0.0            |
| Entorhinal cortex                         | 0.1 ± 0.1            |
| Piriform cortex                           | 0.1 ± 0.1            |
| Somatosensory cortex                      | 0.1 ± 0.1            |
| <b>Amygdala</b>                           |                      |
| Posterior cortical amygdala nucleus       | 0.2 ± 0.1            |
| Anterior amygdaloid area                  | 0.1 ± 0.1            |
| Amygdalohippocampus                       | 0.1 ± 0.0            |
| <b>Hippocampus</b>                        |                      |
| CA1                                       | 0.5 ± 0.3            |
| Pyramidal cell layer of hippocampus       | 0.5 ± 0.4            |
| <b>'Other' forebrain regions</b>          |                      |
| Zona inserta                              | 1.2 ± 1.2            |
| Sub-inserta nucleus                       | 0.8 ± 0.8            |
| Nucleus horizontal vertical diagonal band | 0.6 ± 0.3            |
| Medial habenula                           | 0.4 ± 0.4            |
| Mediodorsal thalamic nucleus              | 0.3 ± 0.3            |
| <b>Midbrain/brainstem</b>                 |                      |
| Substantia nigra                          | 0.9 ± 0.6            |
| Periaqueductal grey area                  | 0.7 ± 0.5            |
| Dorsal Raphe                              | 0.3 ± 0.1            |
| Reticulotegmental nucleus of pons         | 0.3 ± 0.3            |
| Posterodorsal tegmental nucleus           | 0.3 ± 0.3            |
| Superior colliculus                       | 0.3 ± 0.3            |
| Central grey of pons                      | 0.2 ± 0.2            |
| Ventral tegmental area                    | 0.1 ± 0.1            |
| Premedian raphe nucleus                   | 0.1 ± 0.1            |
| Intermediate layer superior colliculus    | 0.1 ± 0.1            |
| Pontine reticular nucleus                 | 0.1 ± 0.1            |
| Interpeduncular nucleus                   | 0.1 ± 0.0            |

**Supplemental Table 1. Monosynaptic rabies tracing of aBNST nociceptin pre-synaptic neurons.** Expression is presented as the percentage number of mCherry somas identified outside the BNST. Mean ± SEM from 3 mice.

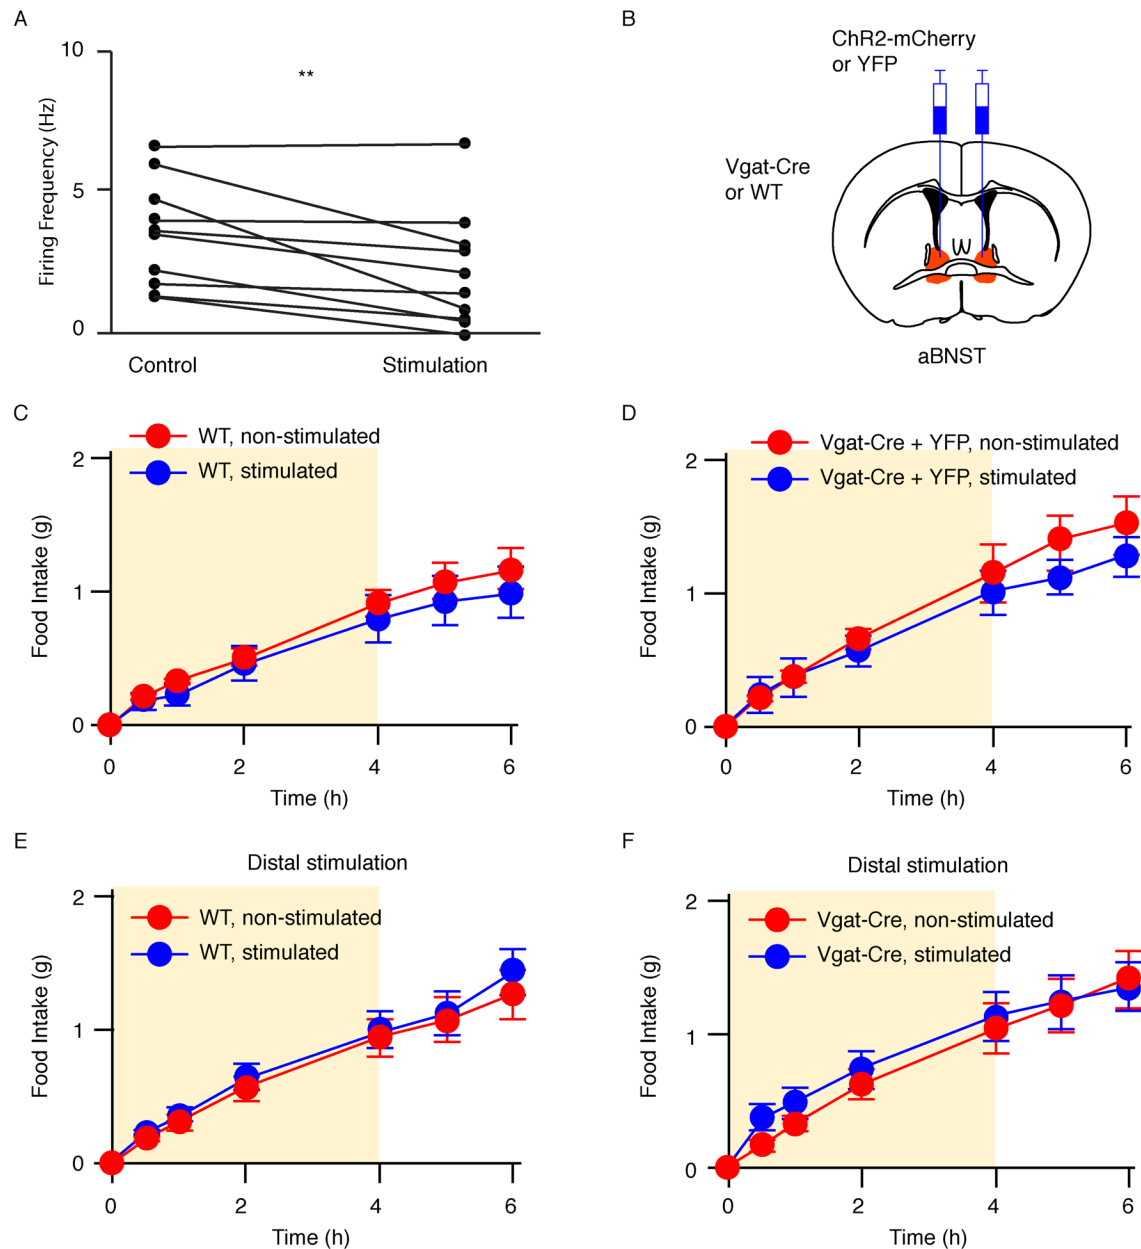

**Supplemental Figure 1. Optogenetic stimulation does not suppress feeding in wild-type Vgat-Cre littermate mice.**

(A) Graph showing the pairing of action potential frequency in arcuate NPY neurons ( $n = 10$  neurons from 3 mice) before (control) and during photostimulation of aBNST Vgat axons. \*\*  $p < 0.01$  (paired  $t$ -test;  $t(9) = 3.33$ ,  $p = 0.009$ ). (B) Diagram of the aBNST in Vgat-Cre or wild-type (WT) mice injected with either cre-dependent ChR2-mCherry or YFP. (C-F) Cumulative food intake following an overnight fast during (shaded area) and after photostimulation in WT (C and E) or Vgat-Cre (D and F) mice injected with ChR2-mCherry (C, E and F) or YFP (D) into the aBNST. Food intake was measured without (non-stimulated, red) and with photostimulation (stimulated, blue) by optical fibers placed within (C and D) or ~0.9 mm dorsal (E and F) to the arcuate nucleus. Mean  $\pm$  SEM. (C)  $N = 9$  mice, 2-way RM ANOVA (Interaction:  $f(6,96) = 0.18$ ,  $p = 0.98$ ; stimulation:  $f(1,16) = 0.14$ ,  $p = 0.71$ ). (D)  $N = 4$  mice, 2-way RM ANOVA (Interaction:  $f(6,36) = 0.74$ ,  $p = 0.62$ ; stimulation:  $f(1,6) = 0.47$ ,  $p = 0.52$ ). (E)  $N = 10$  mice, 2-way RM ANOVA (Interaction:  $f(6,108) = 0.23$ ,  $p = 0.97$ ; stimulation:  $f(1,18) = 0.32$ ,  $p = 0.58$ ). (F)  $N = 9$  mice, 2-way RM ANOVA (Interaction:  $f(6,96) = 0.58$ ,  $p = 0.75$ ; stimulation:  $f(1,16) = 0.22$ ,  $p = 0.64$ ).

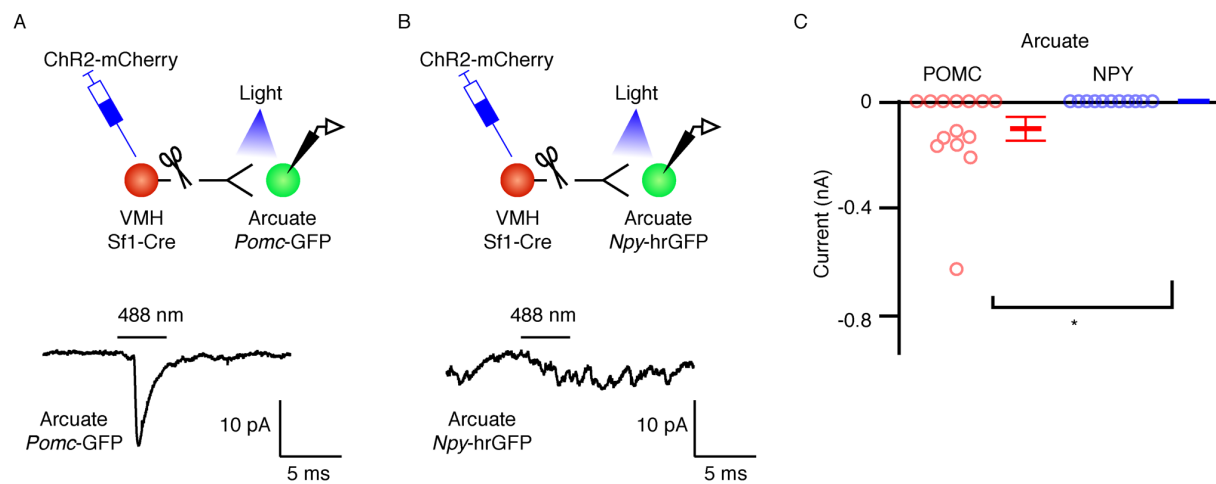

**Supplemental Figure 2. VMH Sf1 neurons do not synapse with arcuate NPY neurons.**

(**A** and **B**) Diagrammatic representation of Sf1-Cre mice crossed with *Pomc*-GFP (**A**, top) or *Npy*-hrGFP (**B**, top) with the VMH injected with ChR2-mCherry AAV. Photostimulated currents are shown in arcuate POMC neurons (**A**, bottom,  $n = 14$ ) but not NPY neurons (**B**, bottom,  $n = 11$ ). (**C**) Evoked synaptic currents in arcuate POMC ( $n = 14$  neurons from 4 mice) and NPY ( $n = 11$  neurons from 4 mice) neurons. Mean  $\pm$  SEM, \*  $p < 0.05$  (unpaired t-test;  $t(23) = 2.15$ ,  $p = 0.046$ ).

A

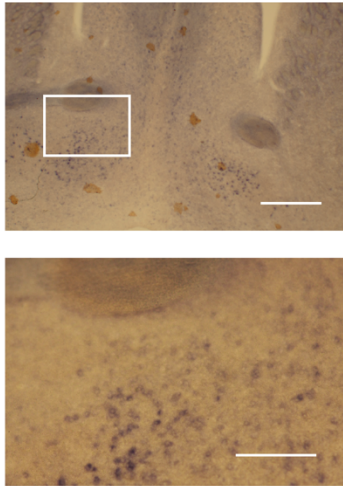

©2013 Allen Institute for Brain Science. Allen Mouse Atlas,  
*Pnoc* - RP\_051206\_02\_A01 – coronal

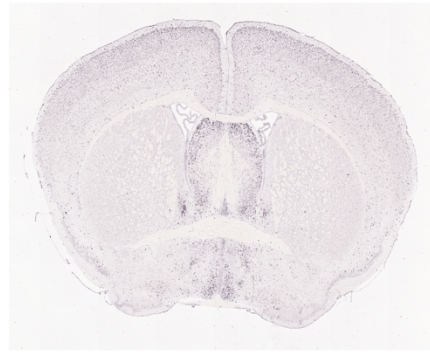

B

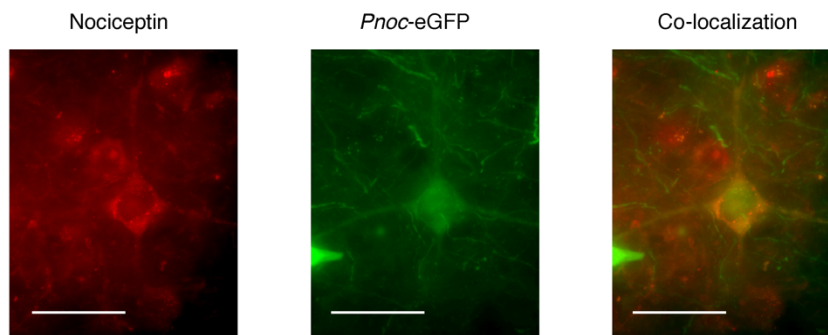

### Supplemental Figure 3. aBNST expression of *Pnoc*.

(A) In situ hybridization of *Pnoc* in the aBNST, septum and preoptic area (left,  $n = 3$ ) compared with *Pnoc* expression published in the Allen Mouse Brain Atlas (right, ©2013 Allen Institute for Brain Science; <http://mouse.brain-map.org/experiment/show/75038402>; *Pnoc*-RP\_051206\_02\_A01–coronal). Scale bars are 500  $\mu\text{m}$  and 200  $\mu\text{m}$  for low and high magnification images, respectively. (B) Representative immunohistochemical images of the aBNST for nociceptin (red, left), eGFP driven by the *Pnoc* promoter (green, middle) and co-localization (right),  $n = 3$ . Scale bars are 20  $\mu\text{m}$ .

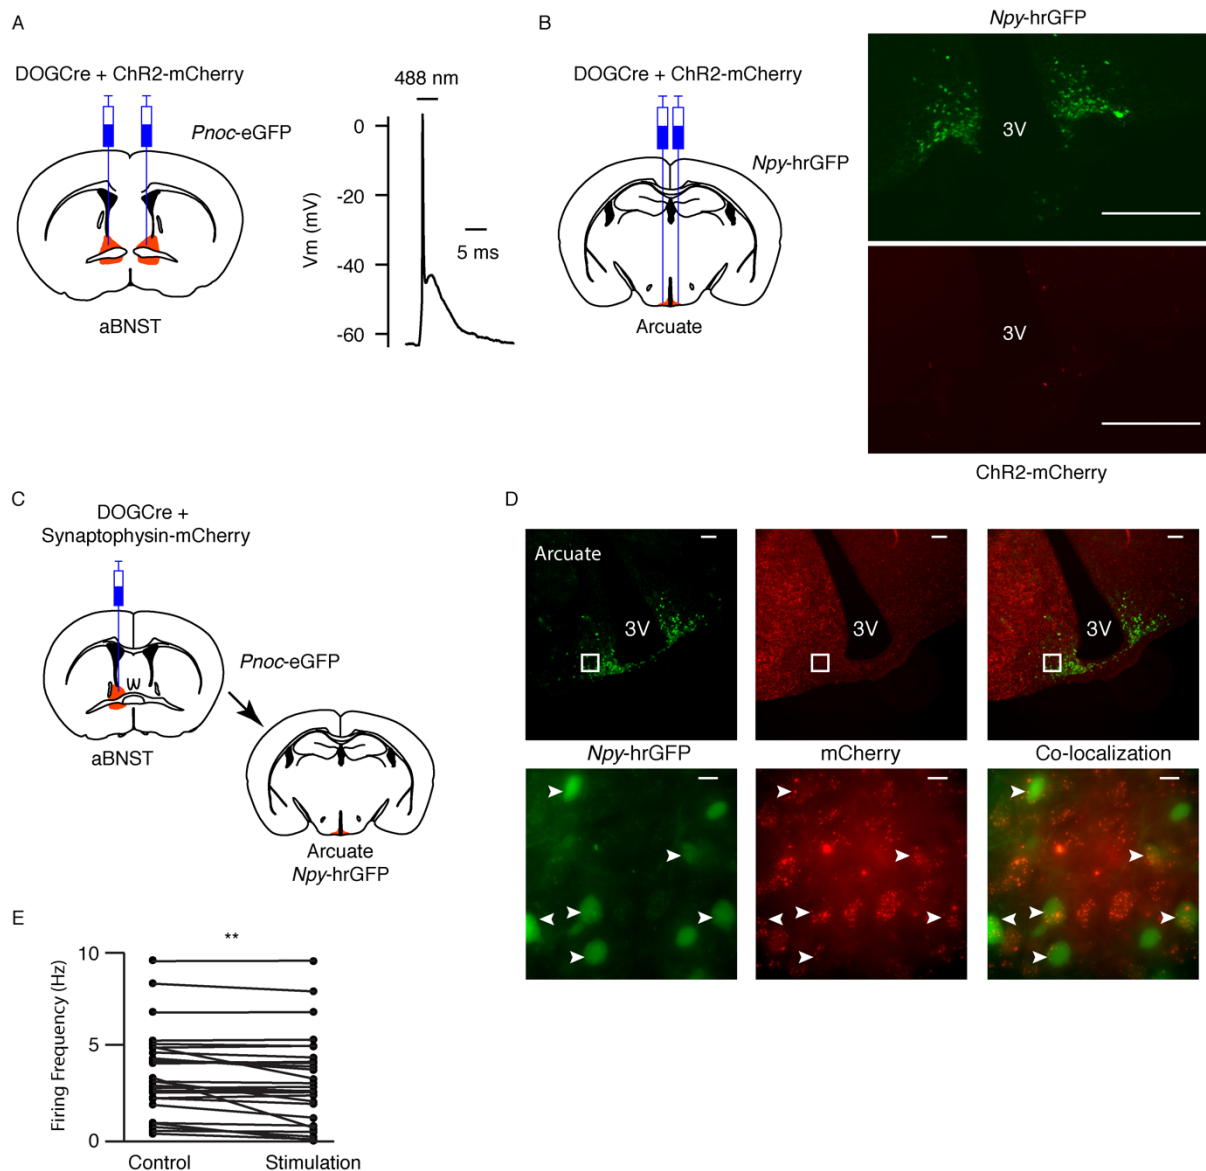

**Supplemental Figure 4. aBNST *Pnoc* axons co-localize with arcuate NPY neurons.**

**(A)** Diagram of the aBNST in *Pnoc*-eGFP mice injected with DOGCre and Chr2-mCherry (left) and voltage trace (right) from a photostimulated Chr2-mCherry expressing aBNST neuron ( $n = 3$ ). **(B)** Diagram (left) of an arcuate neuronal section injected with DOGCre and Chr2-mCherry AAVs into *Npy*-hrGFP mice. Image of hrGFP expression (green, right-top) which does not lead to cre-dependent mCherry expression (red, right-bottom) in the arcuate nucleus,  $n = 6$ . Scale bars are 200  $\mu\text{m}$ . **(C)** Line diagram of the aBNST and arcuate nucleus in *Pnoc*-eGFP mice crossed with *Npy*-hrGFP mice. The aBNST was unilaterally injected with AAVs containing DOG-Cre and cre-dependent synaptophysin fused to mCherry. **(D)** Expression of *Npy*-hrGFP (left), mCherry (middle) and co-localization (right) in the arcuate nucleus at low (top) and high (bottom) magnification corresponding to the boxed regions ( $n = 3$ ). Arrows represent co-localization between *Npy*-hrGFP and synaptophysin-mCherry. Scale bars are 100  $\mu\text{m}$  for low and 10  $\mu\text{m}$  for high magnification images. 3V, 3<sup>rd</sup> ventricle. **(E)** Graph showing the pairing of action potential frequency in arcuate NPY neurons ( $n = 28$  neurons from 9 mice) before (control) and during photo-stimulation of aBNST *Pnoc* axons. \*\*  $p < 0.01$  (paired t-test;  $t(27) = 3.33$ ,  $p = 0.003$ ).

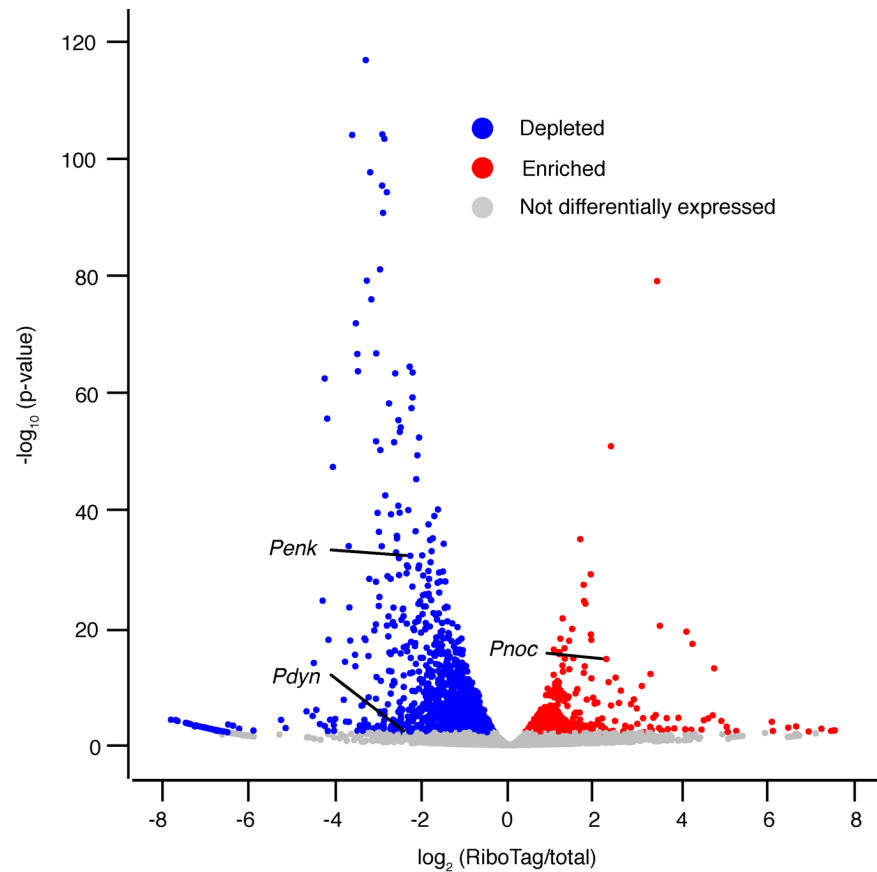

**Supplemental Figure 5. RiboTag enrichment of RNA in *Pnoc* aBNST neurons.**

Volcano plot of the fold-change between RiboTagged *Pnoc*-eGFP neurons versus total extracted RNA in the aBNST against statistical significance (Binomial Wald test,  $p < 0.05$  corrected for multiple testing by the Benjamin-Hochberg algorithm). Genes depleted are shown in blue, enriched in red and not differentially expressed in gray ( $n = 2$  pools from 6 mice).

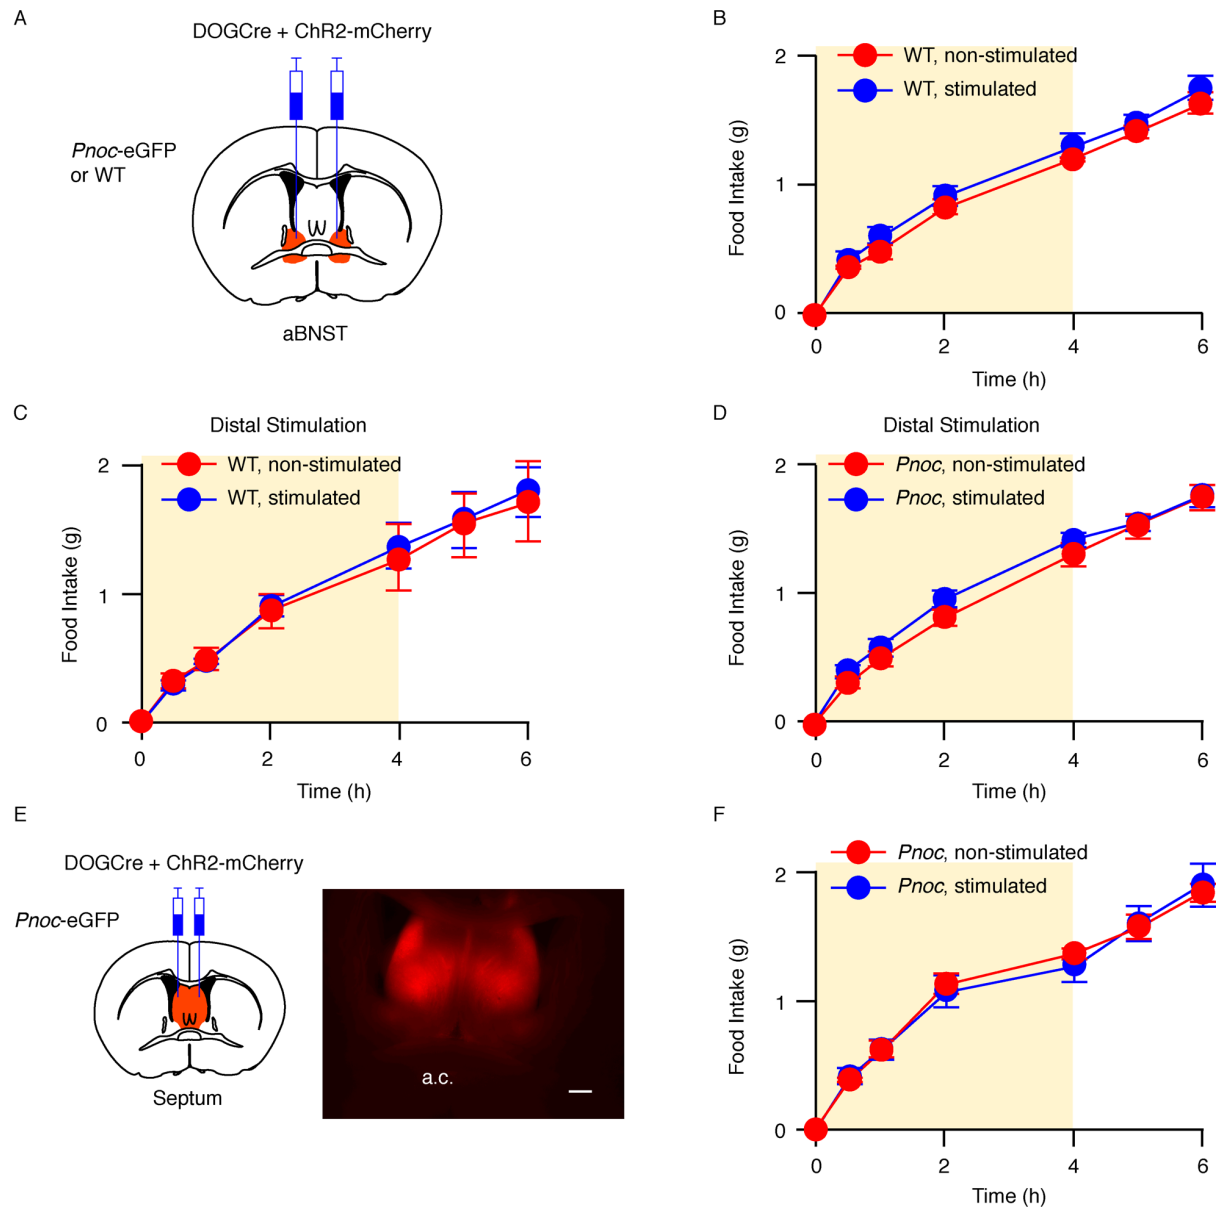

**Supplemental Figure 6. Optogenetic stimulation does not suppress feeding in wild-type *Pnoc*-eGFP littermate mice.**

(A) Line diagram of the aBNST in *Pnoc*-eGFP or wild-type (WT) mice injected with DOGCre and ChR2-mCherry. (B-D) Cumulative food intake following an overnight fast in WT (B and C) and *Pnoc*-eGFP (D) littermate mice injected with DOGCre and ChR2-mCherry into the aBNST during (shaded area) and after photostimulation of the arcuate nucleus. Food intake was measured without (non-stimulated, red) and with photostimulation (stimulated, blue) by optical fibers placed within (B) or ~0.6 mm dorsal (C and D) to the arcuate nucleus. Mean  $\pm$  SEM. (B) N = 4 mice. 2-way RM ANOVA (Interaction:  $f(6,36) = 0.51$ ,  $p = 0.80$ ; stimulation:  $f(1,6) = 1.64$ ,  $p = 0.25$ ). (C) N = 4 mice. 2-way RM ANOVA (Interaction:  $f(6,36) = 0.09$ ,  $p = 1.00$ ; stimulation:  $f(1,6) = 0.03$ ,  $p = 0.87$ ). (D) N = 7 mice. 2-way RM ANOVA (Interaction:  $f(6,72) = 0.60$ ,  $p = 0.73$ ; stimulation:  $f(1,12) = 1.06$ ,  $p = 0.32$ ). (E) Line diagram of the septum (shaded red) in *Pnoc*-eGFP mice (left) injected with DOGCre and ChR2-mCherry into the septum. Representative expression of ChR2-mCherry is shown in the right panel ( $n = 5$ ). Scale bar is 200  $\mu$ m. a.c., anterior commissure. (F) Cumulative food intake in *Pnoc*-eGFP mice injected with ChR2-mCherry into the septum during (shaded area) and after photostimulation of the arcuate nucleus. Food intake was measured without (non-stimulated, red) and with photostimulation (stimulated, blue). Mean  $\pm$  SEM,  $n = 5$  mice. 2-way RM ANOVA (Interaction:  $f(6,48) = 0.30$ ,  $p = 0.93$ ; stimulation:  $f(1,8) = 0.02$ ,  $p = 0.88$ ).

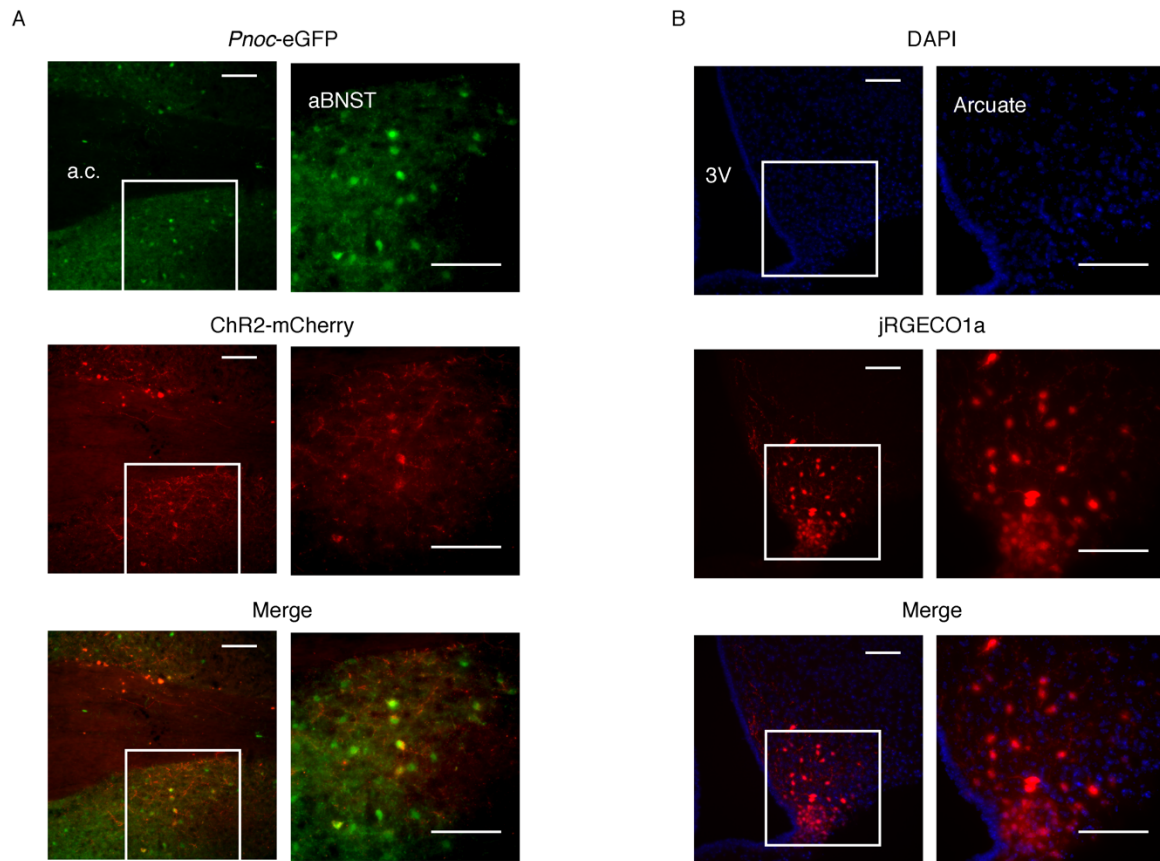

**Supplemental Figure 7. Expression of Chr2 in aBNST and jRGECO1a in the arcuate nucleus.**

(**A** and **B**) Representative florescent images of the aBNST (**A**) and arcuate nucleus (**B**) in *Pnoc*-eGFP mice inter-crossed with *Agrp*-Cre mice ( $n = 5$ ). The aBNST was injected with DOG-flpo and flp-dependent Chr2-mCherry and the arcuate with cre-dependent jRGECO1a. (**A**) eGFP expression driven by the *Pnoc* promotor (top), flp-dependent expression of Chr2-mCherry (middle) and co-localization (bottom) is shown at low (left) and high (right) magnifications corresponding to the boxed regions. (**B**) DAPI staining (top), cre-dependent expression of jRGECO1a in AgRP neurons (middle) and co-localization (bottom) is shown at low (left) and high (right) magnifications corresponding to the boxed regions. Scale bars are 100  $\mu$ m. 3V, 3<sup>rd</sup> ventricle; a.c., anterior commissure.

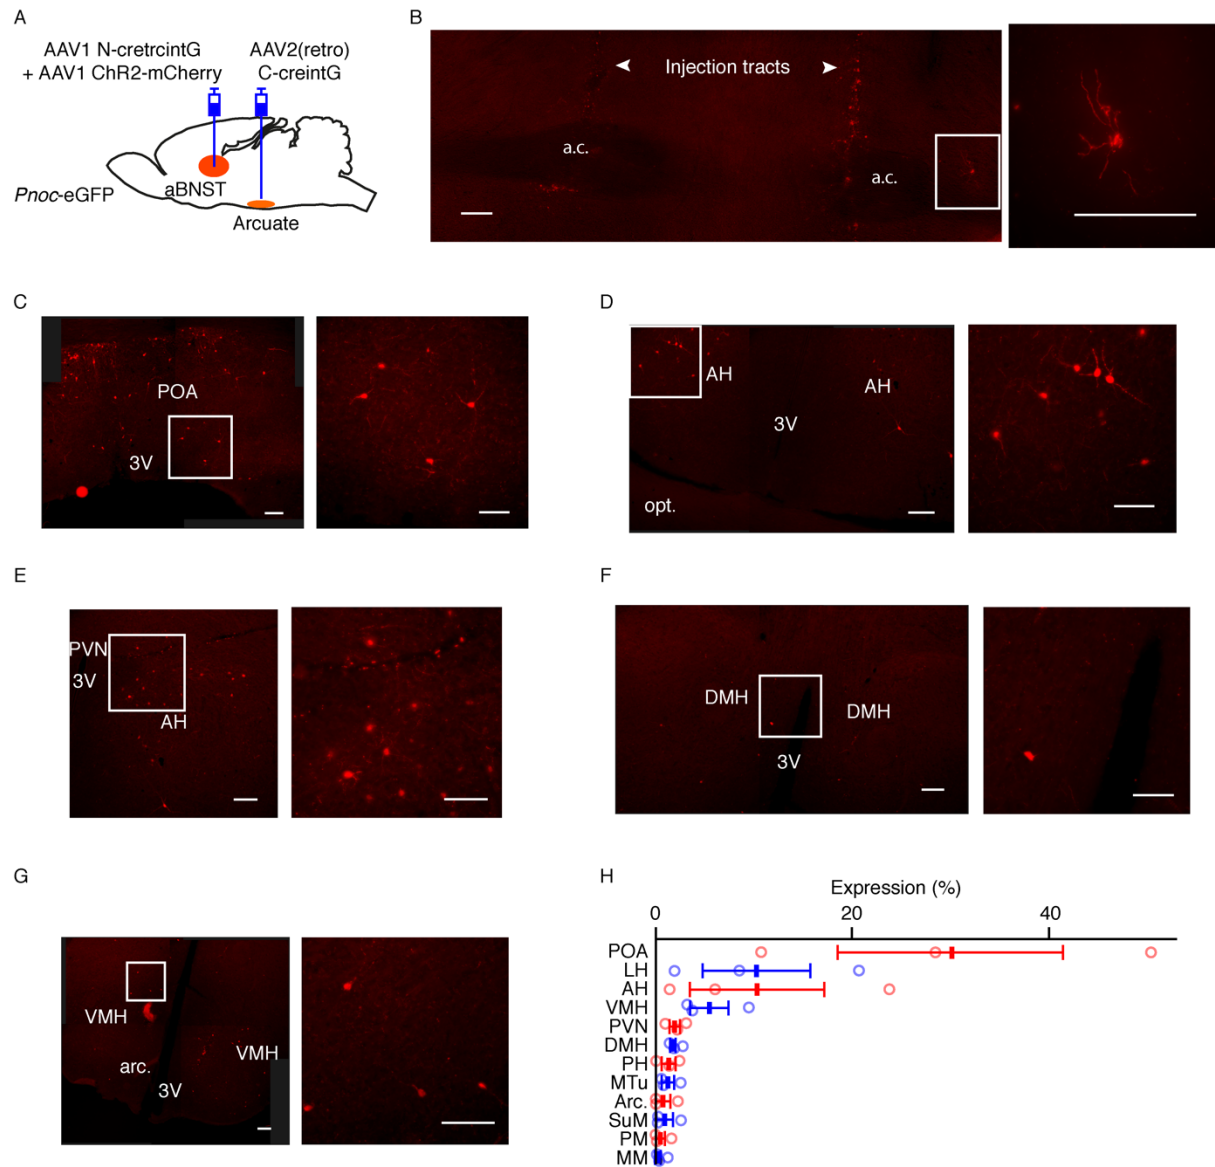

**Supplemental Figure 8. A population of aBNST *Pnoc* neurons receives inputs from the hypothalamus.**

(A) Diagram showing one component of DOGCre (C-creintG, serotyped with AAV2(retro) to enable retrograde expression) injected into arcuate nucleus and complementary component of DOGCre (N-cretrcintG serotyped with AAV1) injected into aBNST of *Pnoc*-eGFP mice to target aBNST *Pnoc* neurons projecting to mediobasal hypothalamus. (B) Cre-dependent Chr2-mCherry was injected into aBNST as an expression marker. Mosaic low magnification image (left) and expanded section (right) corresponding to the boxed region ( $n = 3$ ). (C–G) Expression of mCherry driven by rabies virus in pre-synaptic neurons downstream from hypothalamic projecting aBNST *Pnoc* neurons in the POA (C), AH (D), PVN (E), DMH (F), VMH (G). Expanded sections (right) correspond to the boxed region in the mosaic low magnification images (left,  $n = 3$ ). Scale bars are 200  $\mu\text{m}$  and 100  $\mu\text{m}$  for low and high magnification images, respectively. (H) mCherry expression levels in the hypothalamus as a percentage of the total number of cells expressing mCherry (excluding the BNST). Mean  $\pm$  SEM from 3 mice. 3V, 3<sup>rd</sup> ventricle; a.c., anterior commissure; AH, anterior hypothalamus; Arc., arcuate nucleus; DMH, dorsomedial hypothalamus; LH, lateral hypothalamus; MM, medial mammillary nucleus; MTu, medial tuberal nucleus; opt., optic tract.; PVN, paraventricular nucleus; PH, posterior hypothalamus; PM, pre-mammillary nucleus; POA, preoptic area; SuM, supra-mammillary nucleus; VMH, ventromedial hypothalamus.

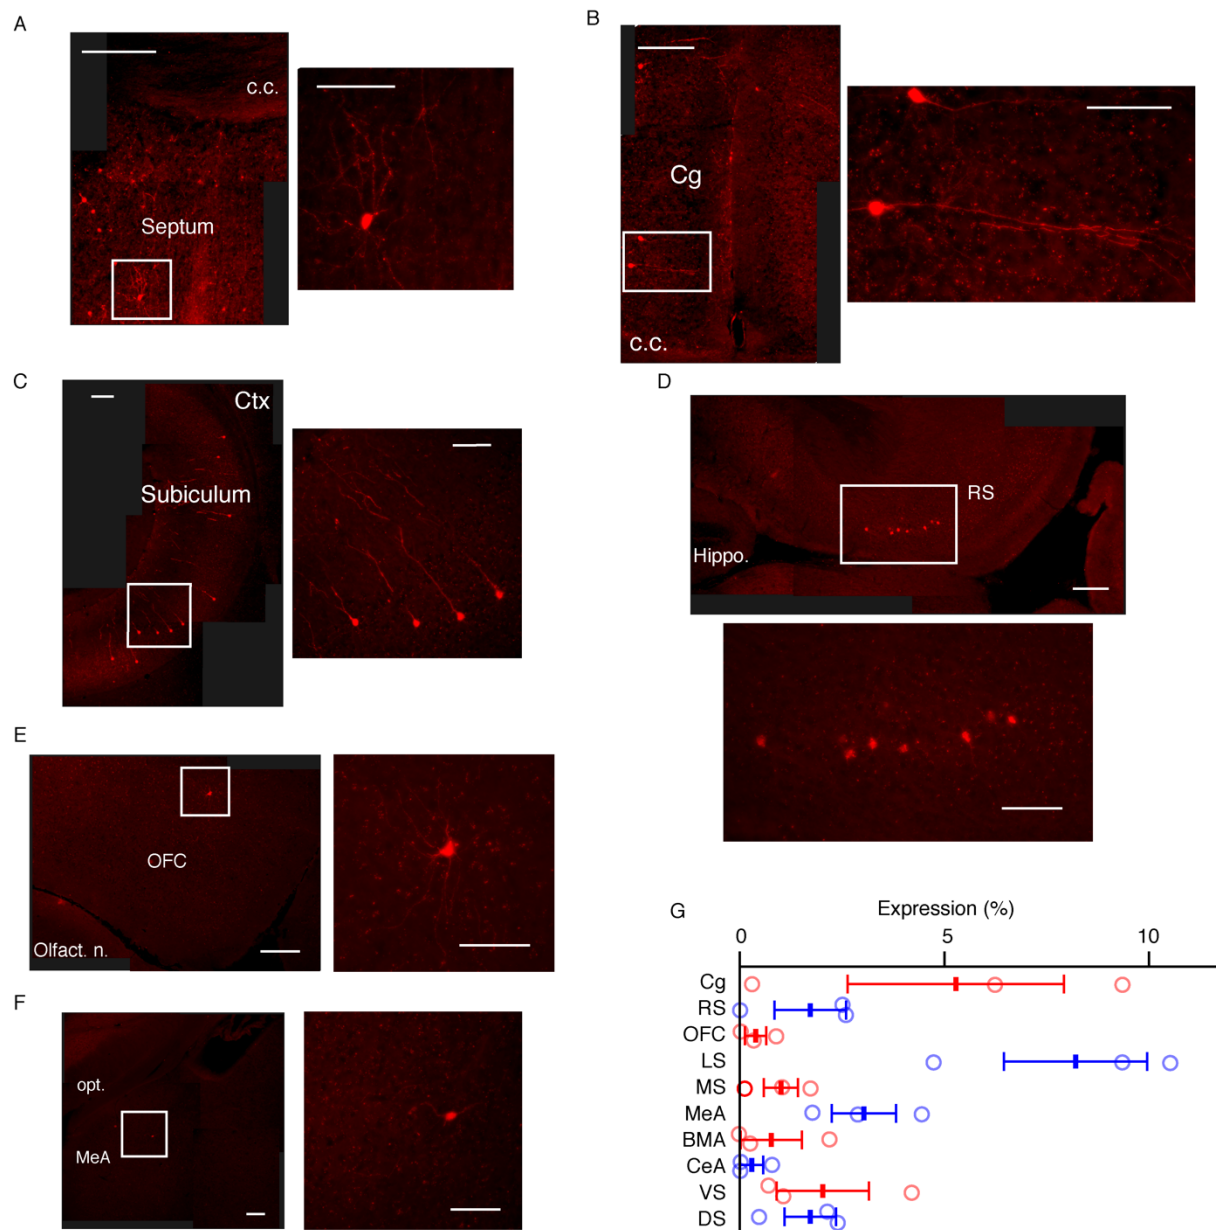

**Supplemental Figure 9. Hypothalamic projecting aBNST *Pnoc* neurons receive presynaptic inputs from limbic and cortical regions.**

(A- F) Expression of mCherry driven by rabies virus in pre-synaptic neurons downstream from hypothalamic projecting aBNST *Pnoc* neurons in the septum (A), cingulate (B), subiculum (C), retrosplenial cortex (D), orbital frontal cortex (E), medial amygdala (F). Expanded sections (right) correspond to the boxed region in the mosaic low magnification images (left,  $n = 3$ ). Scale bars are 200  $\mu\text{m}$  and 100  $\mu\text{m}$  for low and high magnification images, respectively. (G) Expression of mCherry labelled neurons outside of the BNST and the hypothalamus. Mean  $\pm$  SEM from 3 mice. BMA, basomedial amygdala; CeA, central amygdala; c.c., corpus callosum; DS, dorsal subiculum; Cg, cingulate cortex; hippo., hippocampus; LS, lateral septum; MeA, medial amygdala; MS, medial septum; Olfact. n., olfactory nucleus; opt., optic tract; OFC, orbital frontal cortex; RS, retrosplenial cortex; VS, ventral subiculum.
